# Supplementary material
Source: publisher figshare collection journal article supplement (https://acs.figshare.com/ndownloader/files/22774583)
Supplement: Supplementary file 1 [file 22774583]

## **Supporting Information**

# **Template Removal from SBA-15 by Ionic Liquid for Amine Grafting: Applications to CO<sub>2</sub> Capture and Natural Gas Desulfurization**

Yiren Wang <sup>1</sup>, Ralph T. Yang <sup>1\*</sup>

<sup>1</sup>Department of Chemical Engineering, University of Michigan, Ann Arbor, MI, USA

Address: 3074 H.H. Dow, 2300 Hayward Street, Ann Arbor, MI 48109-2136, USA.

Support Information content:

Number of Pages: 2

Number of Figures: 1

### Effect of ionic liquid treatment temperature

When conducting the ionic liquid treatment at 90 °C, the organic template P123 can also be removed from as-synthesized SBA-15. The resulting amine grafted adsorbent showed a similar CO<sub>2</sub> adsorption capacity to the NH<sub>2</sub>-SBA-15-IL treated at 120 °C.

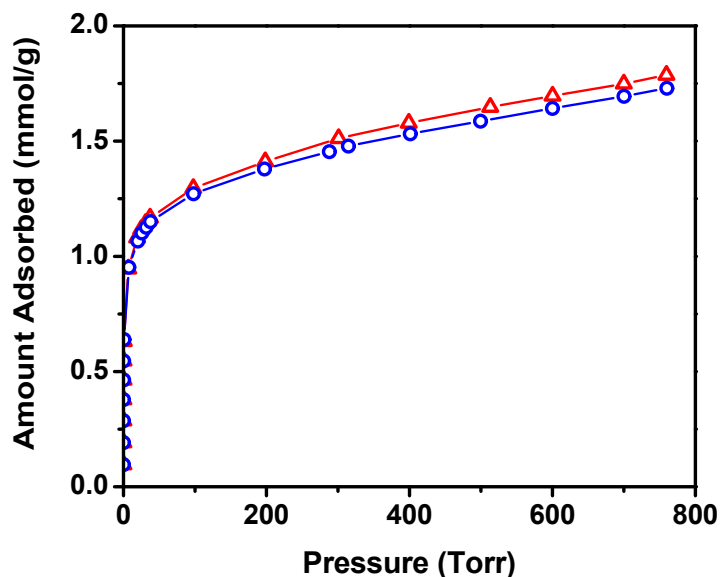

**Figure S1.** CO<sub>2</sub> adsorption isotherms on amine-grafted SBA-15 with different ionic liquid treatment temperature (△ was treated at 120 °C and ○ was treated at 90 °C).
